# Supplementary material
Source: PubMed Central journal article supplement (PMC5864242)

Supplementary Figure 1.: Sampling area one month before clearcutting in May 2013 and one year after clearcutting in June 2014.

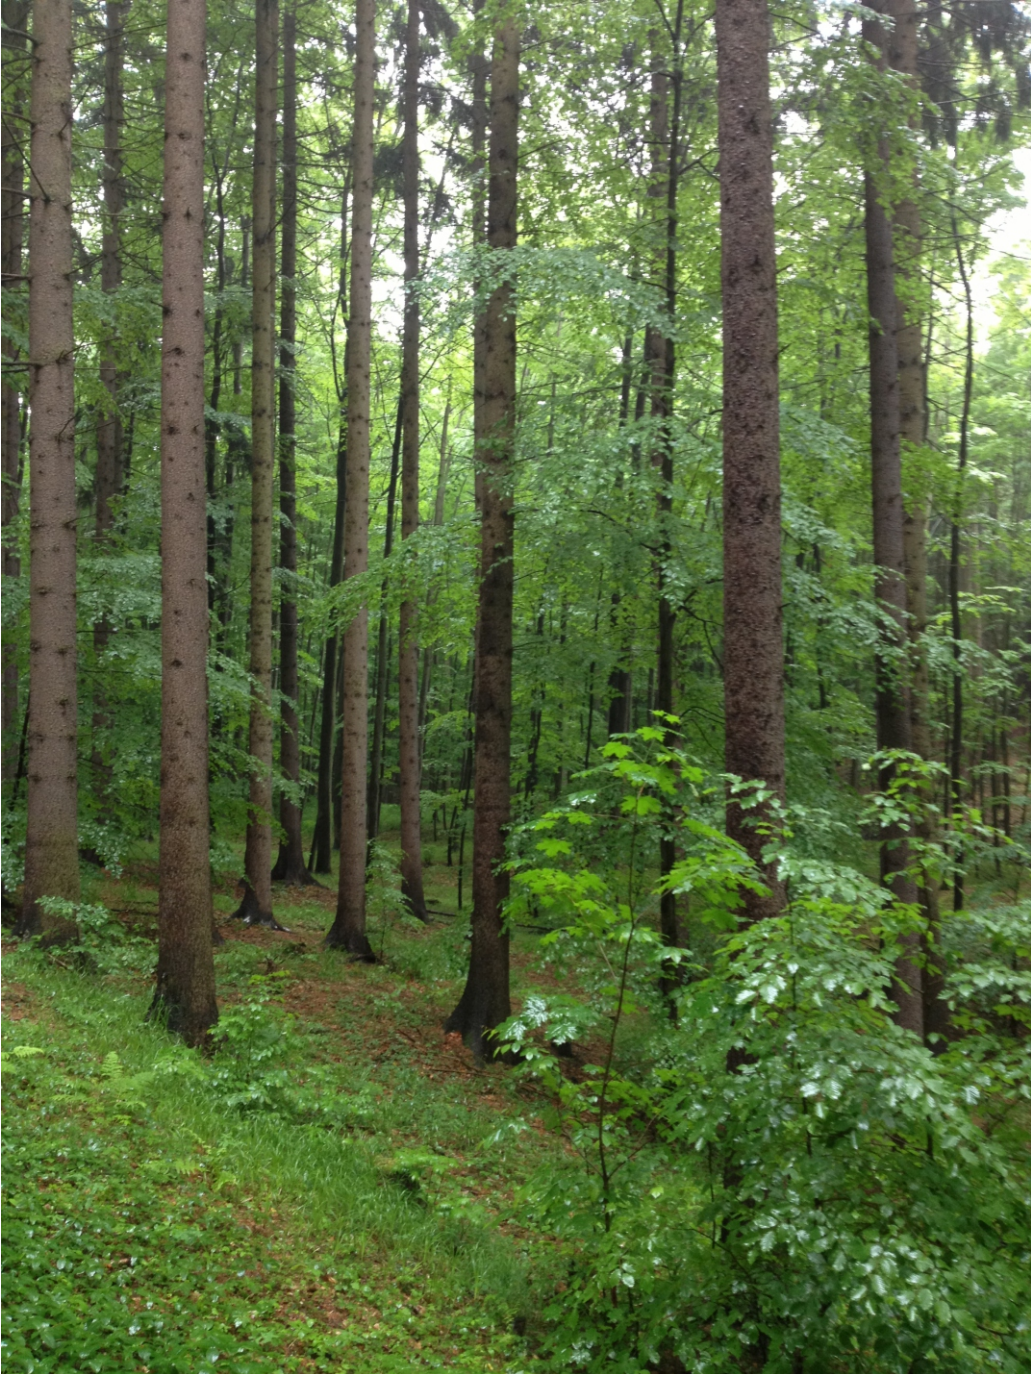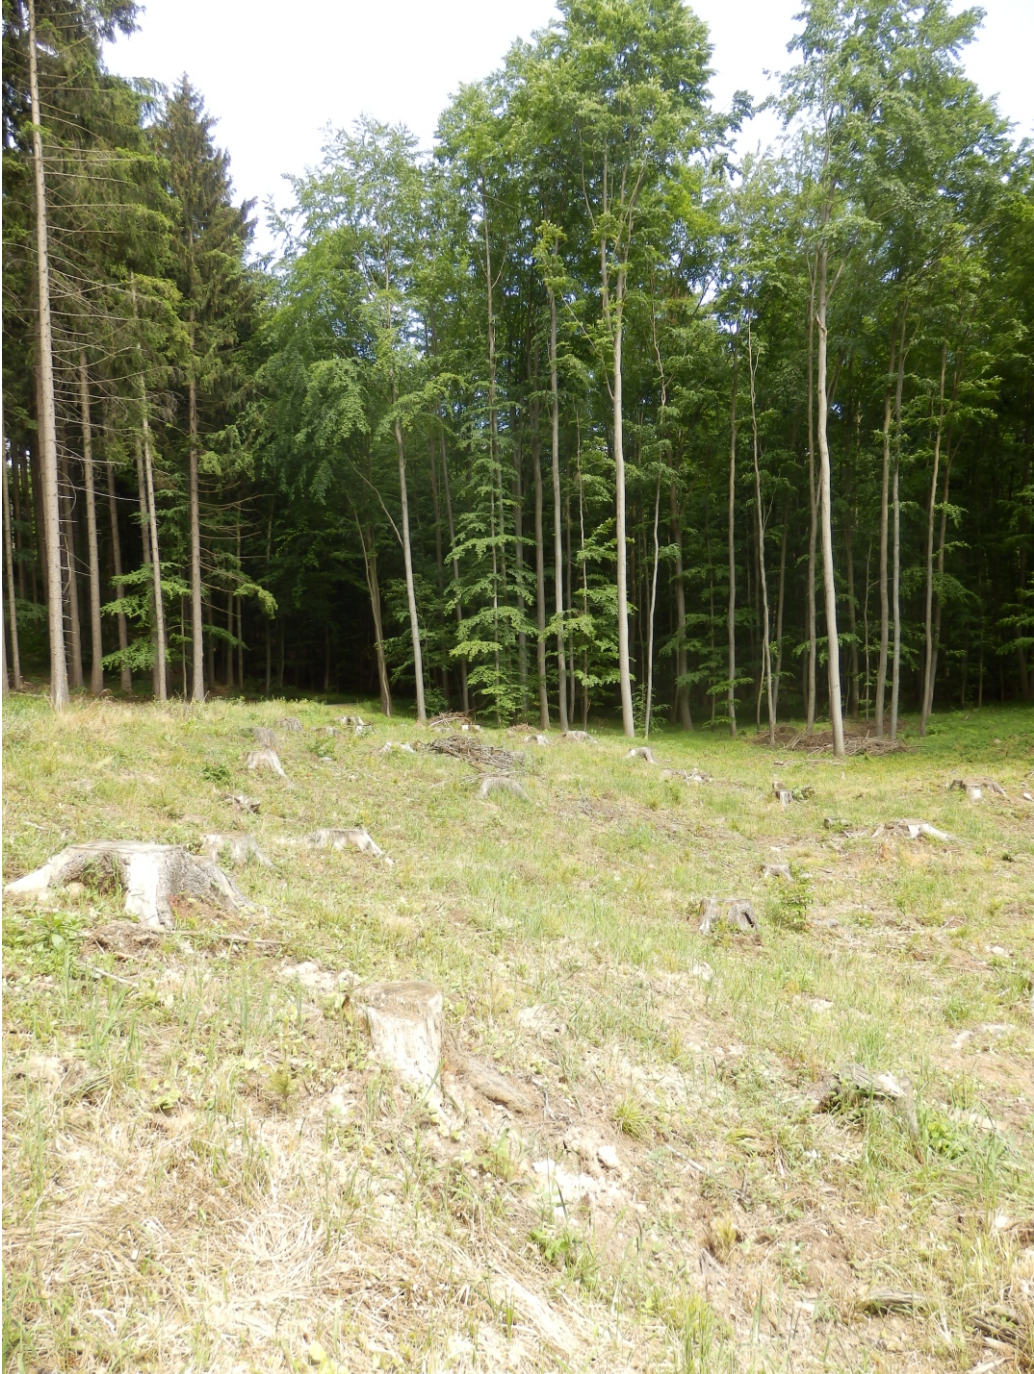

Supplement: 41396_2017_27_MOESM1_ESM.pdf [file 41396_2017_27_MOESM1_ESM.pdf]
