# Supplementary material
Source: PubMed Central journal article supplement (PMC5864242)

Supplementary Figure 2.: Climatic data for the Brno-Turany station, Czech Republic, relevant for the study area.

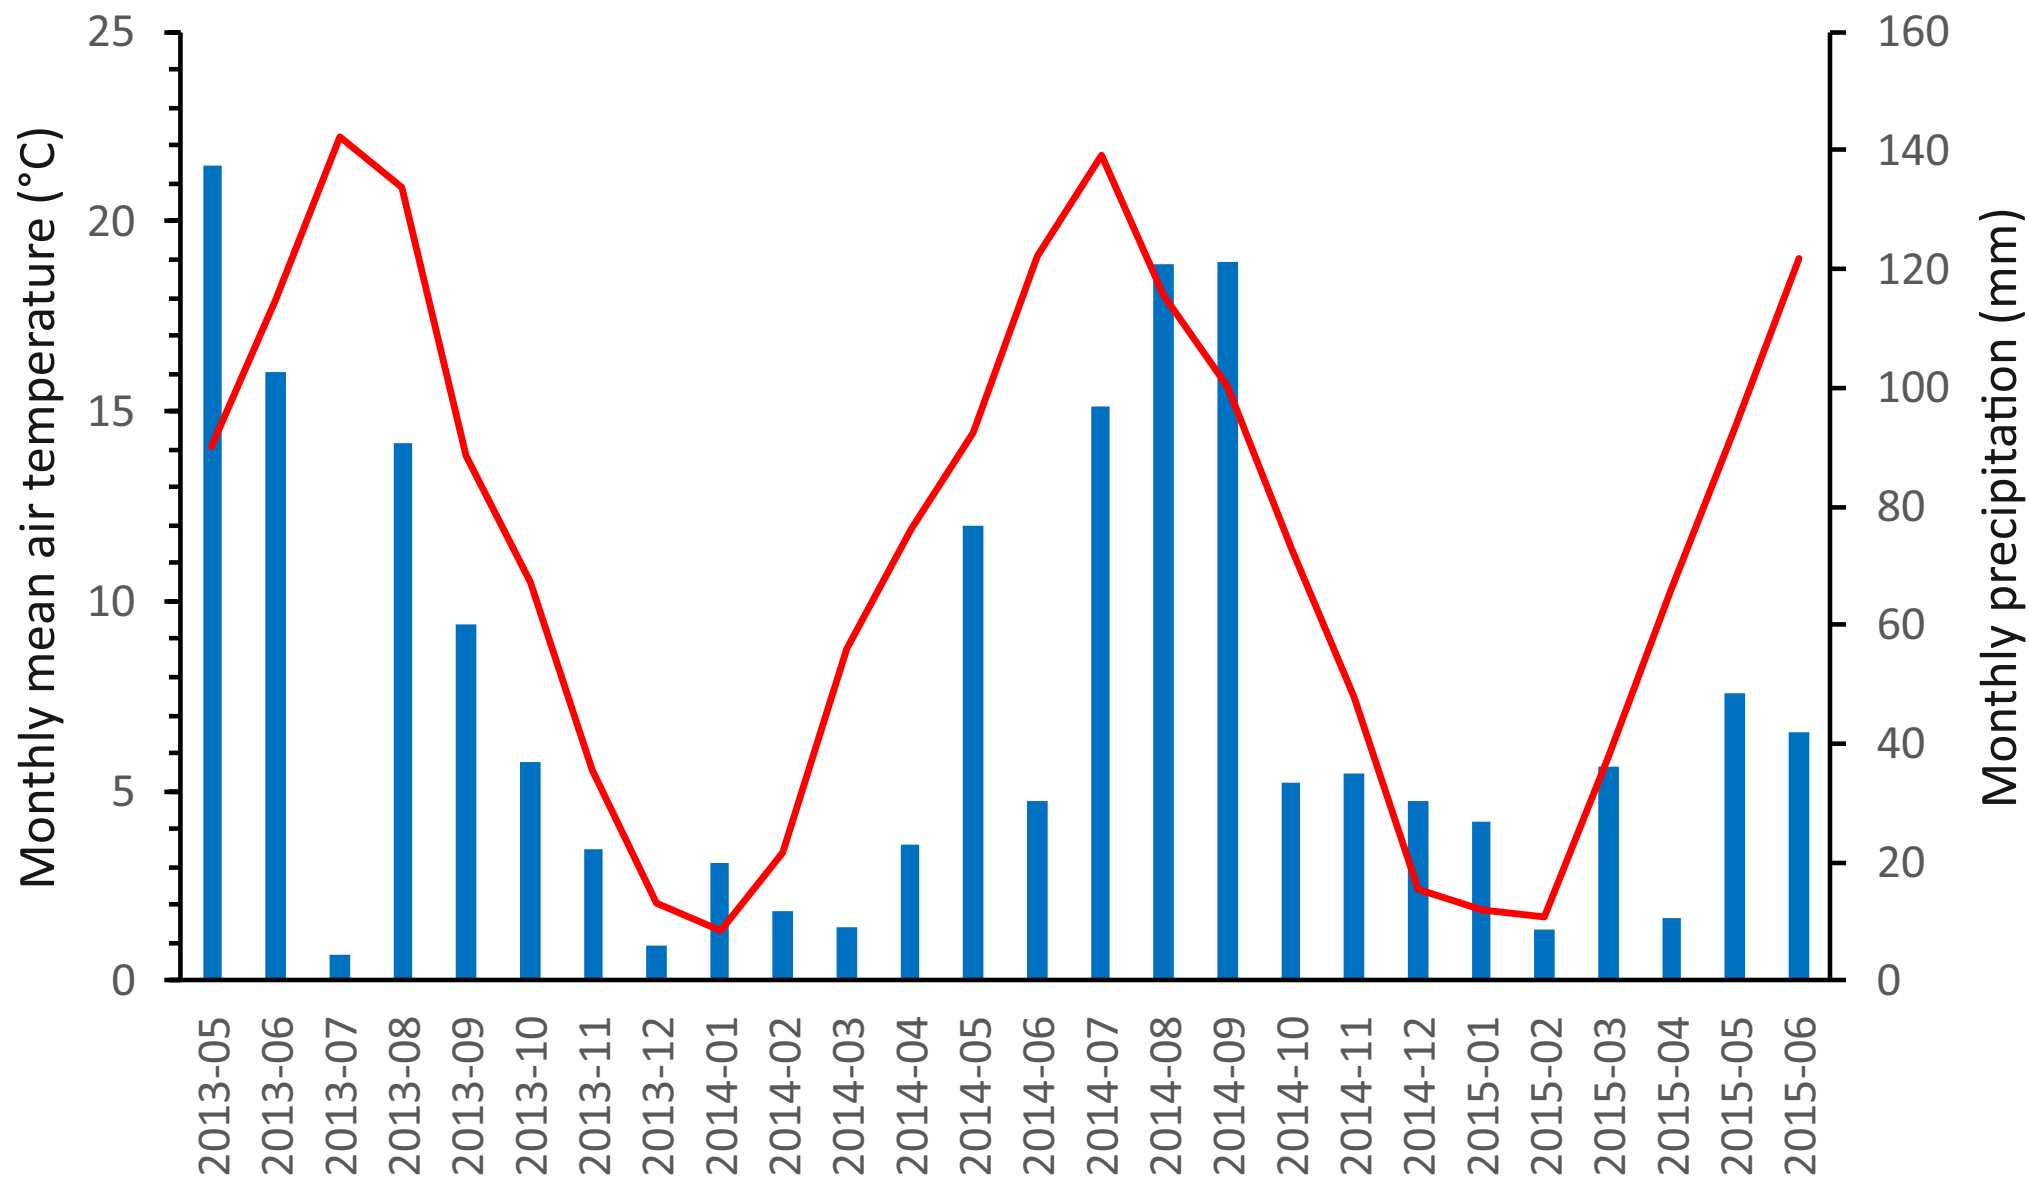

Supplement: 41396_2017_27_MOESM2_ESM.pdf [file 41396_2017_27_MOESM2_ESM.pdf]
